# Supplementary material for: Space-confined growth of large-mismatch CsPb(BrxCI1−x)3/GaN heterostructures with tunable band alignments and optical properties
Source: Royal Society of Chemistry journal article supplement (doi:10.1039/d2qi01039a), 2022-01-01
Supplement: d2qi01039a1.pdf [file d2qi01039a1.pdf]

Supporting Information for

**Space-Confined Growth of Large-Mismatch CsPb(Br<sub>x</sub>Cl<sub>1-x</sub>)<sub>3</sub>/GaN  
Heterostructures with Tunable Band Alignments and Optical  
Properties**

Mingsong Zhang<sup>a</sup>, Qingyuan Luo<sup>a</sup>, Chuangwei Sheng<sup>a</sup>, Dan Cao<sup>b</sup>, Xiaoshuang Chen<sup>c</sup>,  
and Haibo Shu<sup>a,\*</sup>

<sup>a</sup>*College of Optical and Electronic Technology and* <sup>b</sup>*College of Science, China Jiliang University, 310018 Hangzhou, China.*

<sup>c</sup>*National Laboratory for Infrared Physics, Shanghai Institute of Technical Physics, Chinese Academy of Science, 200083 Shanghai, China*

\*Corresponding authors Haibo Shu, email : [shuhaibo@cjl.u.edu.cn](mailto:shuhaibo@cjl.u.edu.cn)

**Table S1** Experimental growth parameters for the synthesis of  $\text{CsPb}(\text{Br}_x\text{Cl}_{1-x})_3$  on *c*-GaN substrate with four different compositions, including molar ratio of precursors, temperature of Zone-1 ( $T_1$ ) and Zone-2 ( $T_2$ ), gas flow, the distance between the precursors and substrate ( $d$ ), and growth time ( $\tau_g$ ).

| Composition<br>( $x$ ) | Precursor (molar ratio) |                   |      |                   | $T_1$ (°C) | $T_2$<br>(°C) | Gas flow<br>(sccm) | $d$ (cm) | $\tau_g$ (min) |
|------------------------|-------------------------|-------------------|------|-------------------|------------|---------------|--------------------|----------|----------------|
|                        | CsCl                    | PbCl <sub>2</sub> | CsBr | PbBr <sub>2</sub> |            |               |                    |          |                |
| 0                      | 1                       | 1                 | 0    | 0                 | 700        | 430           | 110                | 19       | 25             |
| 0.29                   | 0                       | 1                 | 1    | 0                 | 700        | 440           | 110                | 19       | 25             |
| 0.49                   | 4                       | 1                 | 0    | 3                 | 700        | 440           | 110                | 19       | 25             |
| 0.73                   | 1                       | 0                 | 0    | 1                 | 700        | 460           | 110                | 19       | 25             |
| 1                      | 0                       | 0                 | 1    | 1                 | 700        | 480           | 110                | 19       | 25             |

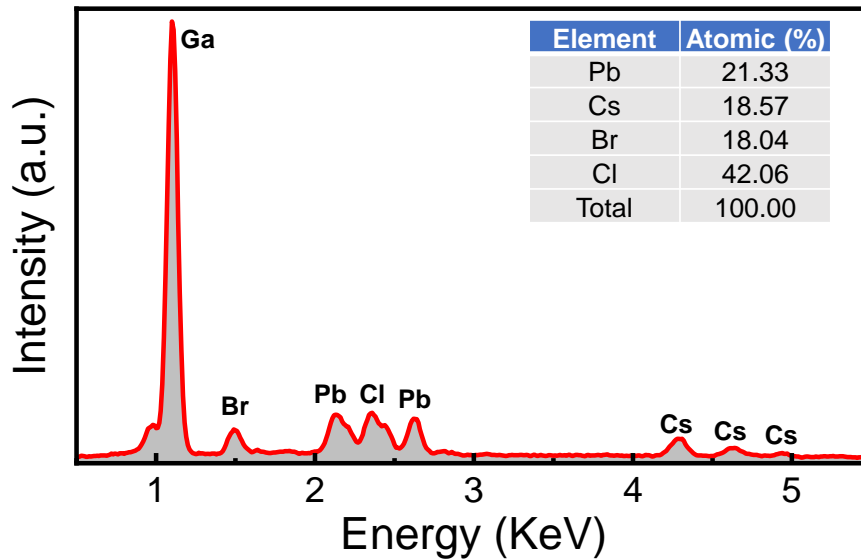

**Fig. S1** EDS spectra of the as-grown  $\text{CsPbBr}_{0.87}\text{Cl}_{2.13}$  NSCs on GaN substrate. The inset indicates the atomic ratio of Cs, Pb, Br, and Cl in the perovskite NSCs.

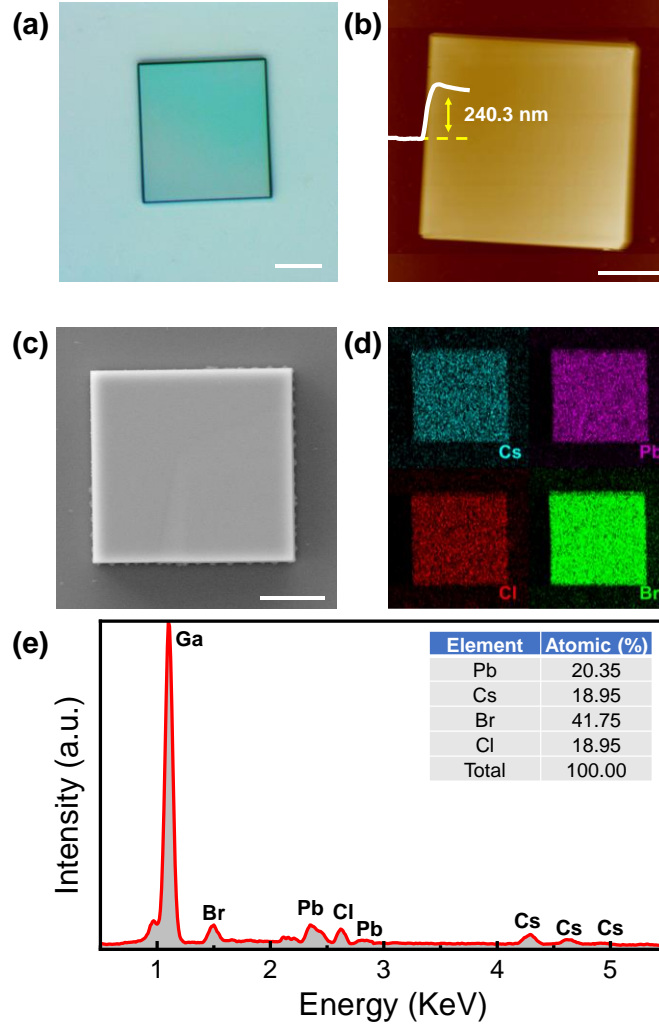

**Fig. S2** Morphology and chemical composition of as-grown  $\text{CsPbCl}_{0.81}\text{Br}_{2.19}$  NSCs on GaN substrate. (a) OM image, (b) AFM image and height profile, (c) SEM image, (d) EDS mappings, and (e) EDS spectra of as-grown  $\text{CsPbBr}_{2.19}\text{Cl}_{0.81}$  on GaN substrate. The inset in (e) indicates the atomic ratio of Cs, Pb, Br, and Cl in the perovskite NSCs. The scale bar is 10  $\mu\text{m}$ .

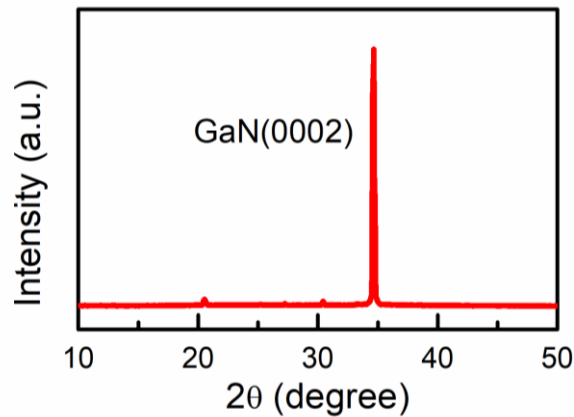

**Fig. S3** XRD pattern of GaN substrate. The sharp diffraction peak located at  $34.5^\circ$  is well-indexed to the (0002) plane of GaN.

Fig. S4a shows the room-temperature PL spectra of the as-grown  $\text{CsPb}(\text{Br}_x\text{Cl}_{1-x})_3$  NSCs on GaN substrate. It can be seen that the PL emission peak continuously increases from 415 nm ( $\sim 2.99$  eV) to 528 nm ( $\sim 2.35$  eV) with the variation of Br content  $x$  from 0 to 1, which arises from composition-dependent band gap in these samples. Since the energy of PL emission peak corresponds to the band gap of the materials, we plot the band gap of  $\text{CsPb}(\text{Br}_x\text{Cl}_{1-x})_3$  NSCs obtained from the PL emission peak as a function of composition  $x$  in Fig. S4b. The band gap values show a nearly linear reduction with the increase of composition  $x$ , and they can be described by Vegard's Law with a bowing parameters  $b$  as follows,

$$E_g(x) = xE_{g(\text{CsPbBr}_3)} + (1-x)E_{g(\text{CsPbCl}_3)} - bx(1-x) \quad (1)$$

Fitting the data of Fig. S4b, we obtain the bowing parameter  $b = 0.05$  eV. The ultras-small bowing parameter implies highly uniform halide element distribution in the as-grown  $\text{CsPb}(\text{Br}_x\text{Cl}_{1-x})_3$  NSCs. The composition-dependent band gaps in the perovskite alloys can be understood by DFT calculations. We plot the band gaps of  $\text{CsPb}(\text{Br}_x\text{Cl}_{1-x})_3$  alloys as a function of Br composition  $x$  in Fig. S4b, and their band structures are presented in Fig. S5. The calculated band gap of  $\text{CsPbCl}_3$  and  $\text{CsPbBr}_3$  is 2.99 and 2.35 eV, which agrees well with the PL emission peak at  $x = 0$  and  $x = 1$ , respectively. Moreover, the bowing parameter  $b$  ( $b = 0.05$  eV) fitted by DFT band gaps is same to that obtained by PL data. The results suggest that the composition-tunable  $\text{CsPb}(\text{Br}_x\text{Cl}_{1-x})_3$  NSCs on GaN substrate without any phase transition and phase separation.

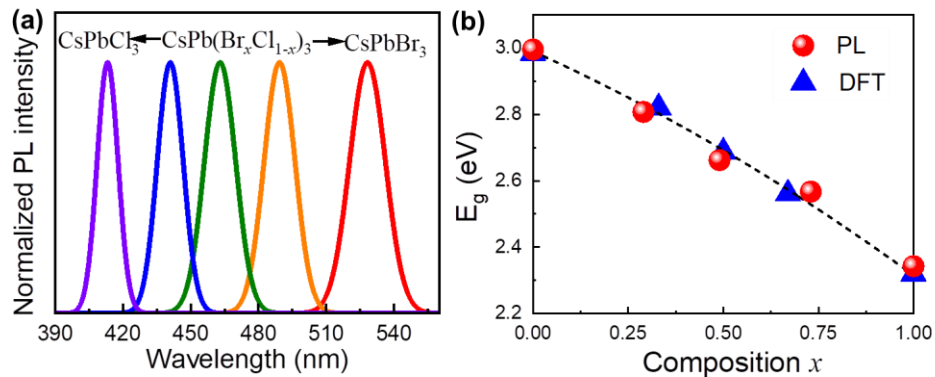

**Fig. S4** Composition-dependent PL spectra and band gaps of  $\text{CsPb}(\text{Br}_x\text{Cl}_{1-x})_3$  grown on GaN substrate. (a) Normalized PL spectra of  $\text{CsPb}(\text{Br}_x\text{Cl}_{1-x})_3$  NSCs on GaN substrate with the composition  $x$  from 0 to 1. (b) Band gap ( $E_g$ ) of  $\text{CsPb}(\text{Br}_x\text{Cl}_{1-x})_3$  NSCs grown on GaN substrate as a function of composition  $x$ . The balls and triangles denote the band gaps from the PL spectra and DFT calculations, respectively.

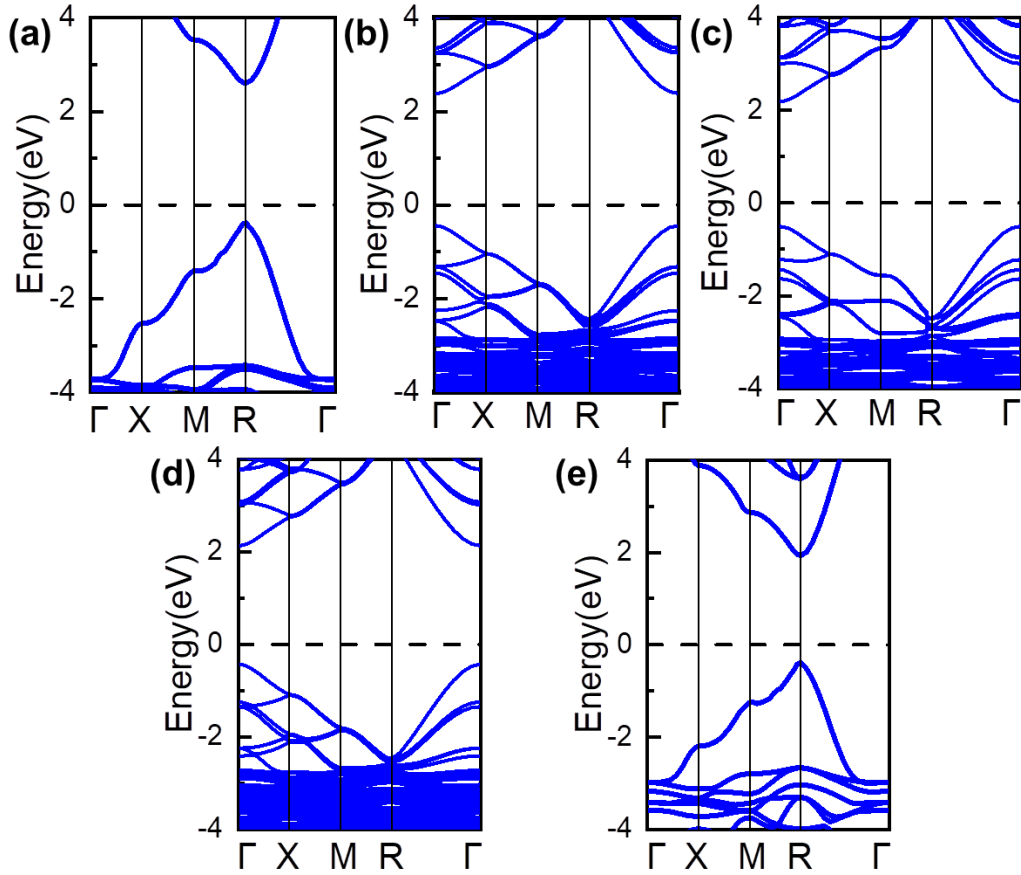

**Fig. S5** Band structures of  $\text{CsPb}(\text{Br}_x\text{Cl}_{1-x})_3$  alloy perovskites calculated by the HSE06 functional. (a) The band structure of  $\text{CsPb}(\text{Br}_x\text{Cl}_{1-x})_3$  with the alloy composition of (a)  $x=0$ , (b)  $x=0.25$ , (c)  $x=0.5$ , (d)  $x=0.75$ , and (e)  $x=1$ . The Fermi level is set to energy zero point. Here the band structures of  $\text{CsPbCl}_3$  and  $\text{CsPbBr}_3$  were calculated by using the  $(1\times 1\times 1)$  primitive cells and other alloy structures were calculated by using the  $(2\times 2\times 2)$  supercells.

**Table S2** Lattice constant  $a$  (in  $\text{\AA}$ ) of cubic  $\text{CsPb}(\text{Br}_x\text{Cl}_{1-x})_3$  perovskites with the variation of alloy composition  $x$  from 0 to 1.

| Composition $x$      | 0     | 0.29  | 0.49  | 0.73  | 1     |
|----------------------|-------|-------|-------|-------|-------|
| Lattice constant $a$ | 5.604 | 5.639 | 5.681 | 5.740 | 5.830 |

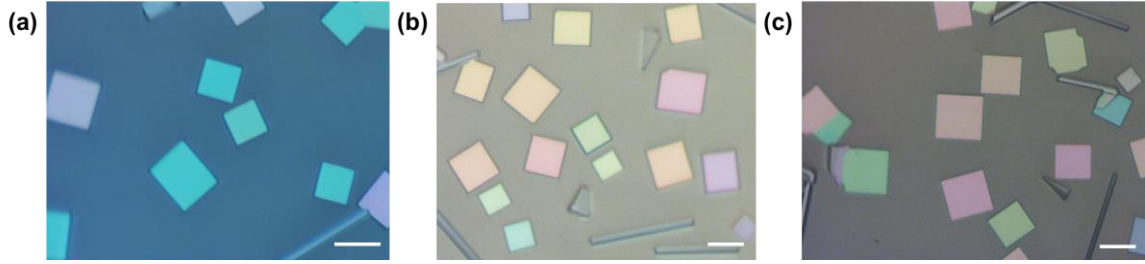

**Fig. S6** OM image of (a)  $\text{CsPbBr}_{0.87}\text{Cl}_{2.13}$ , (b)  $\text{CsPbBr}_{1.47}\text{Cl}_{1.53}$ , and (c)  $\text{CsPbBr}_{2.19}\text{Cl}_{0.81}$  NSCs grown on mica substrate. The scale bar is 20  $\mu\text{m}$ .

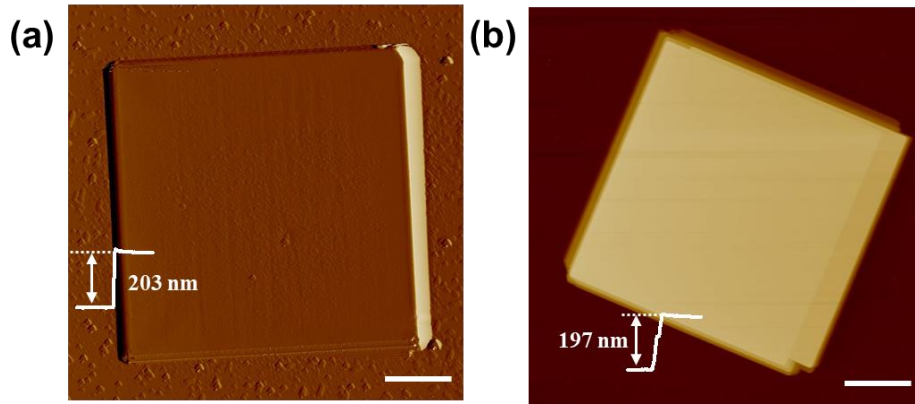

**Fig. S7** AFM image and height profile of (a)  $\text{CsPbBr}_{0.87}\text{Cl}_{2.13}$  and (b)  $\text{CsPbBr}_{2.19}\text{Cl}_{0.81}$  crystal domains grown on mica substrate. The scale bar is 5  $\mu\text{m}$ . The numbers in the height profiles show the thickness of the crystal domains.

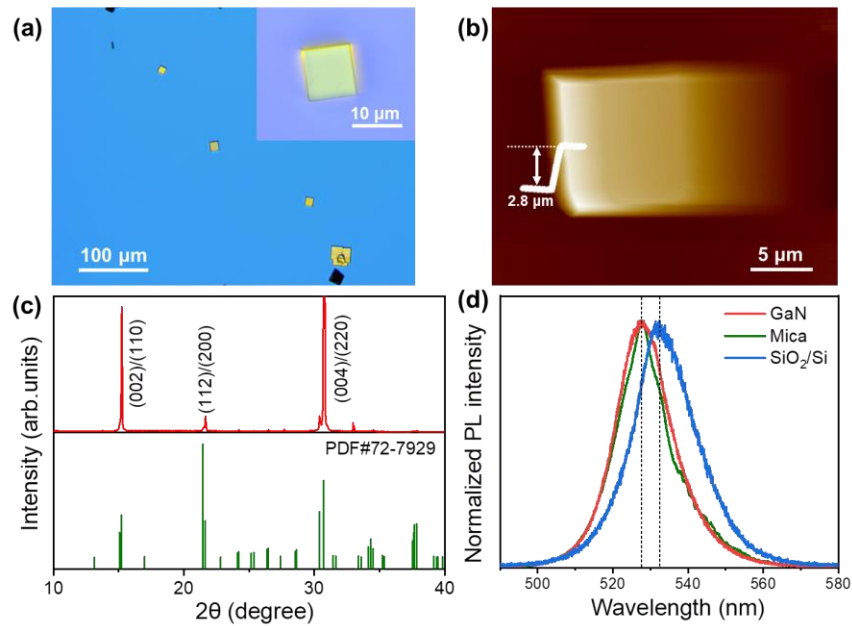

**Fig. S8** Morphological and structural characterizations of  $\text{CsPbBr}_3$  NSCs grown on  $\text{SiO}_2/\text{Si}$  substrate. (a) OM image, (b) AFM image, and XRD pattern of  $\text{CsPbBr}_3$  grown on  $\text{SiO}_2/\text{Si}$  substrate. (d) The comparison of PL spectra of  $\text{CsPbBr}_3$  grown on GaN, mica, and  $\text{SiO}_2/\text{Si}$  substrates.

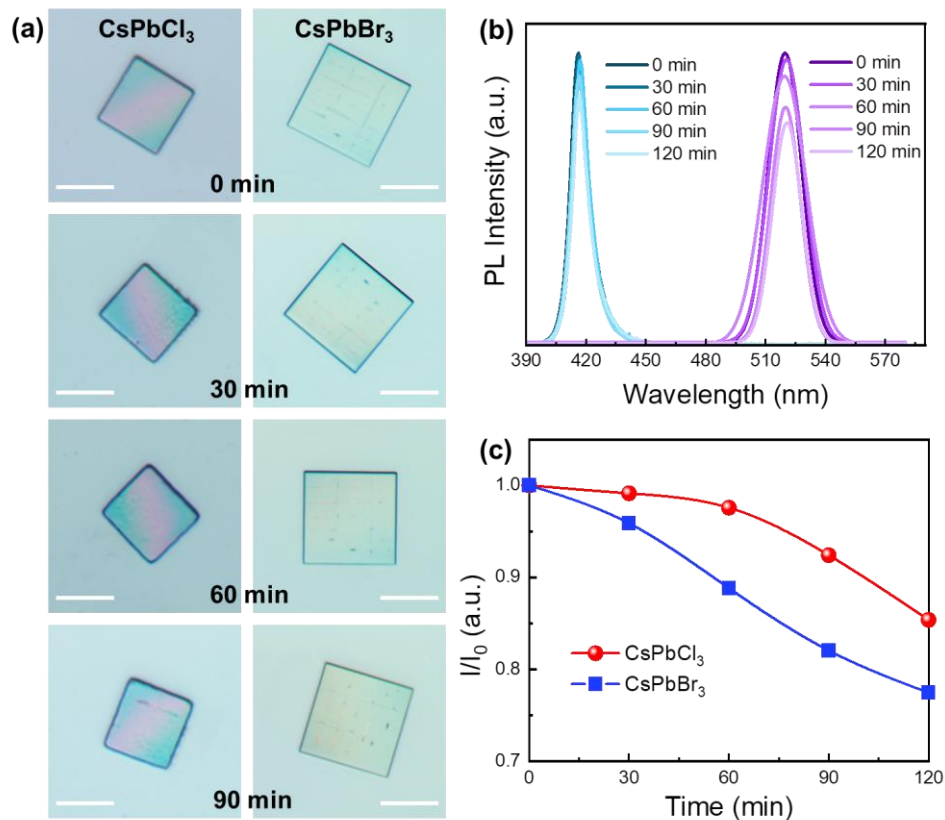

**Fig. S9** Ambient stability comparison between the CsPbCl<sub>3</sub> and CsPbBr<sub>3</sub> grown on GaN substrate. (a) OM images, (b) PL spectra, (c) PL intensity ratio ( $I/I_0$ ) of CsPbCl<sub>3</sub> and CsPbBr<sub>3</sub> grown on *c*-GaN substrate with the variation of exposure time from 0 to 120 min. The scale bar in OM images is 20  $\mu$ m.  $I_0$  and  $I$  denote the PL emission intensity of the pristine and etching perovskite samples, respectively

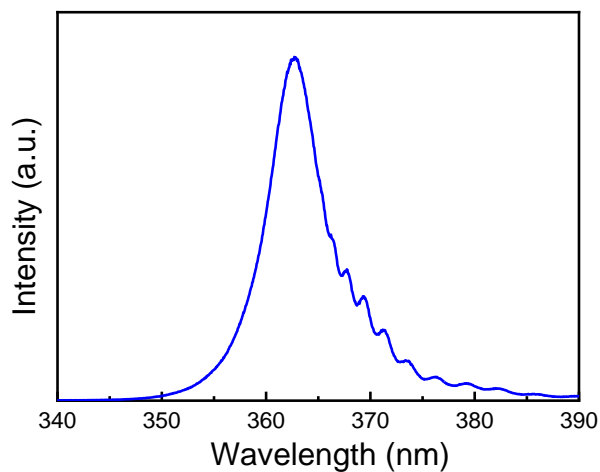

**Fig. S10** PL spectra of GaN substrate. It was conducted under 325 nm laser excitation with the laser beam focused on a spot size of  $\sim 2$   $\mu$ m.

**Table S3** The fitting parameters of TRPL spectra of CsPb(Br<sub>x</sub>Cl<sub>1-x</sub>)<sub>3</sub> NSCs grown on mica and GaN substrates.

| Perovskite                                | Substrate | $\tau_1$ (ns) | $\tau_2$ (ns) | $\tau_3$ (ns) | $A_1$ | $\omega_1$ | $A_2$ | $\omega_2$ | $A_3$ | $\omega_3$ |
|-------------------------------------------|-----------|---------------|---------------|---------------|-------|------------|-------|------------|-------|------------|
| CsPbCl <sub>3</sub>                       | Mica      | 1.53          | 8.87          | /             | 0.64  | 0.671      | 0.32  | 0.329      | /     | /          |
|                                           | GaN       | 0.67          | 2.56          | 10.88         | 0.921 | 0.910      | 0.08  | 0.080      | 0.011 | 0.010      |
| CsPbBr <sub>0.87</sub> Cl <sub>2.13</sub> | Mica      | 3.608         | 23.02         | /             | 0.861 | 0.876      | 0.12  | 0.124      | /     | /          |
|                                           | GaN       | 4.829         | 4.83          | 17.21         | 0.594 | 0.595      | 0.252 | 0.252      | 0.153 | 0.153      |
| CsPbBr <sub>2.19</sub> Cl <sub>0.81</sub> | Mica      | 6.56          | 33.95         | /             | 0.207 | 0.259      | 0.593 | 0.741      | /     | /          |
|                                           | GaN       | 12.70         | 6.50          | 87.06         | 0.391 | 0.536      | 0.315 | 0.431      | 0.025 | 0.034      |
| CsPbBr <sub>3</sub>                       | Mica      | 12.05         | 59.83         | /             | 0.155 | 0.156      | 0.840 | 0.844      | /     | /          |
|                                           | GaN       | 32.76         | 7.97          | 152.30        | 0.252 | 0.525      | 0.214 | 0.446      | 0.014 | 0.03       |
